# Supplementary material
Source: Springer Nature journal article supplement (https://www.springermedizin.de/resource/supplementary/13048_2012_119_MOESM11_ESM.pdf/9664942)

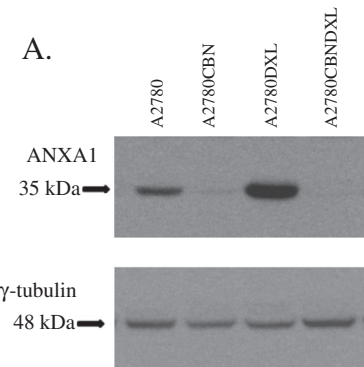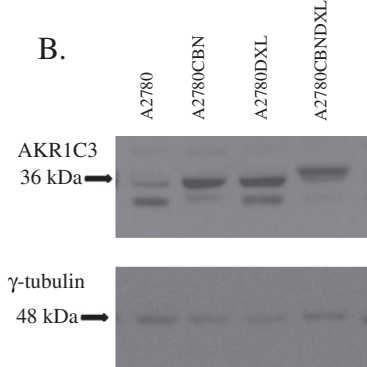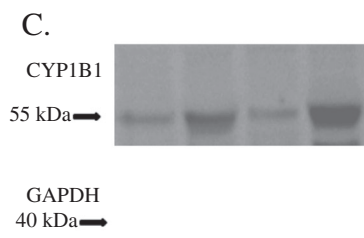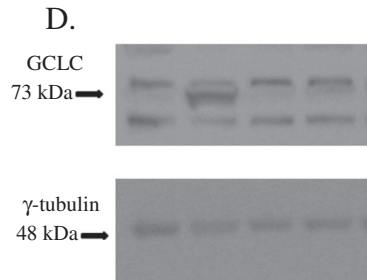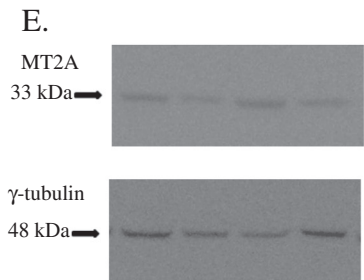

Supplement: MOESM11 [file 9664942]
